# Supplementary material for: Analysis of the microphase structure and performance of self-healing polyurethanes containing dynamic disulfide bonds
Source: Royal Society of Chemistry journal article supplement (doi:10.1039/d0sm01072c), 2020-01-01
Supplement: d0sm01072c1.pdf [file d0sm01072c1.pdf]

### Supporting Information

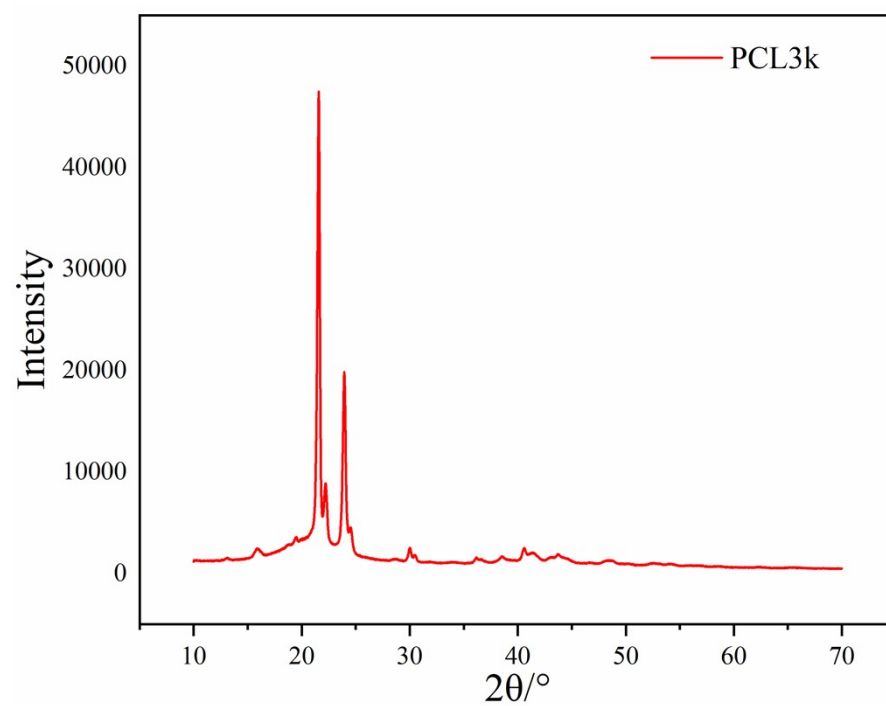

**Figure S1.** The XRD spectrum of PCL3k

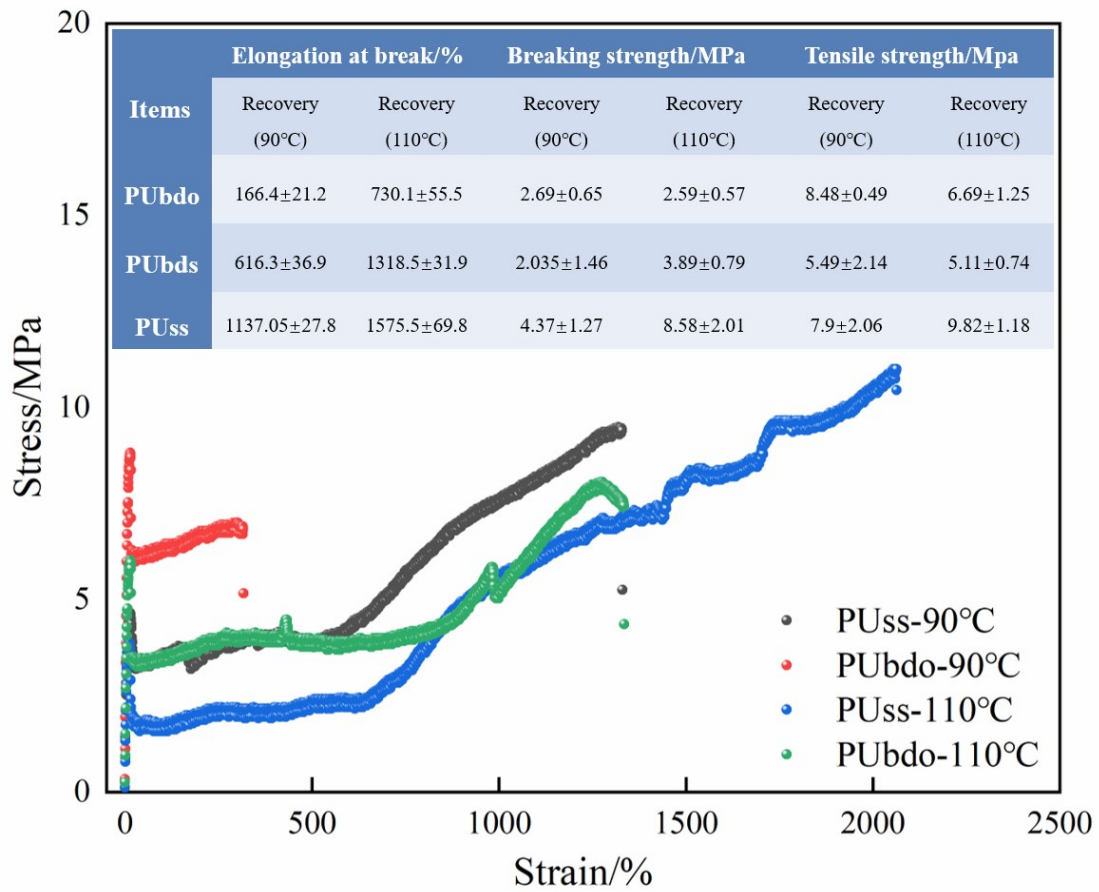

**Figure S2.** The strain-stress curves of self-healable PUss and PUBdo under 110°C/90°C, and the insert table recorded the elongation at break, breaking strength and tensile strength of recovery samples.

**Table S1.** Composition of PUs.

| Samples  | PCL-diol/g | HDI/g | SS/g | BDO/g | TMPMP/g | HS/g | HS/wt% | PCL/wt% |
|----------|------------|-------|------|-------|---------|------|--------|---------|
| PUBdo    | 30         | 3.7   | 0    | 0.43  | 1.91    | 6.04 | 16.76  | 83.24   |
| PUBds    | 30         | 3.7   | 0    | 0.74  | 1.91    | 6.35 | 17.47  | 82.53   |
| PUss     | 30         | 3.7   | 1.2  | 0     | 1.91    | 6.81 | 18.50  | 77.28   |
| PU2ss    | 30         | 4.51  | 2.4  | 0     | 1.91    | 8.01 | 21.07  | 78.93   |
| PUBdo-HS | 0          | 2.02  | 0    | 0.43  | 1.91    | 4.36 |        |         |
| PUBds-HS | 0          | 2.02  | 0    | 0.74  | 1.91    | 4.67 |        |         |
| PUss-HS  | 0          | 2.02  | 1.2  | 0     | 1.91    | 5.13 |        |         |

**Table S2.** FTIR assignments, bands percentage areas of PUs and the calculated relevant parameters for determination of microphase separation in PUs.

| Peak/cm <sup>-1</sup>                                            | Associations                      | PCL3k  | PUBdo  | PUBds  | PUss   |
|------------------------------------------------------------------|-----------------------------------|--------|--------|--------|--------|
| 1680                                                             | Ordered H-bonded carbonyl (PU)    |        | 8.21%  | 10.86% | 0.86%  |
| 1700                                                             | Disordered H-bonded carbonyl (PU) |        | 23.99% | 29.23% | 23.26% |
| 1716                                                             | H-bonded carbonyl (PCL)           | 53.95% | 22.11% | 4.99%  | 24.06% |
| 1721                                                             | Bonded carbonyl (PCL)             | 34.44% | 7.91%  | 11.71% | 6.18%  |
| 1730                                                             | Free carbonyl (PU)                |        | 30.90% | 33.77% | 37.69% |
| 1738                                                             | Free carbonyl (PCL)               | 11.61% | 6.88%  | 9.44%  | 7.95%  |
| X <sub>b</sub> (the weight fraction of H-bonded urethane groups) |                                   |        | 0.379  | 0.410  | 0.272  |
